# Supplementary material
Source: PubMed Central journal article supplement (PMC6525024)

### A CTLs, B Cells, NK Cells in Naive Tumors before ACT

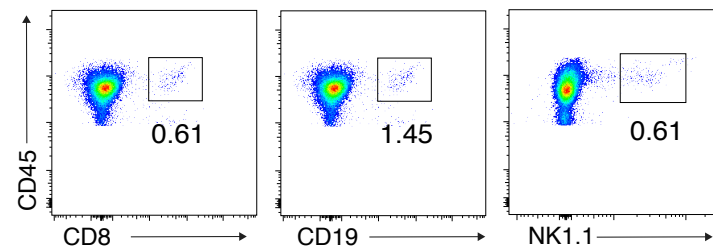

### C PMN-MDSCs & M-MDSCs in Live CD45<sup>+</sup>CD11b<sup>Hi</sup> MHCII<sup>-</sup> Cells

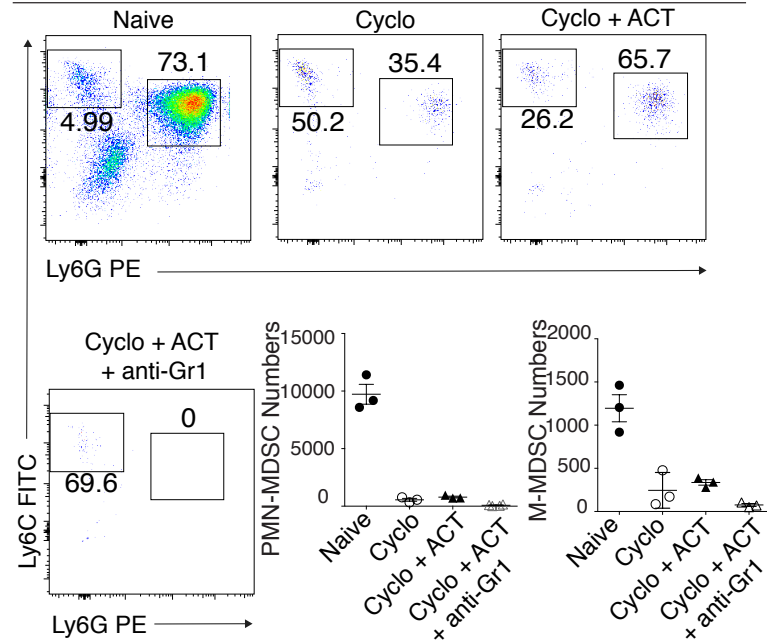

### E Activation Phenotypes of Injected OT1 T cells

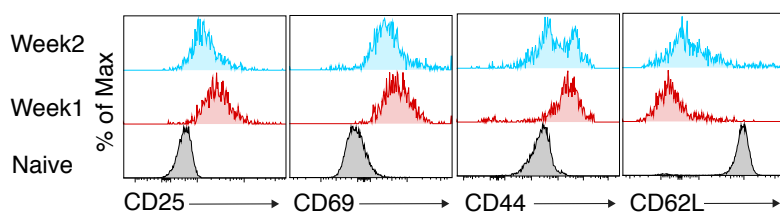

### B Treg Cells in Live CD45<sup>+</sup> Cells

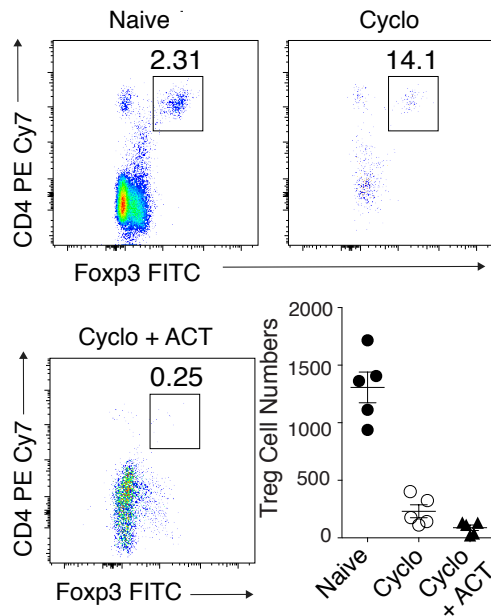

### D TAMs in Live CD45<sup>+</sup>CD11b<sup>Hi</sup> MHCII<sup>+</sup> Cells

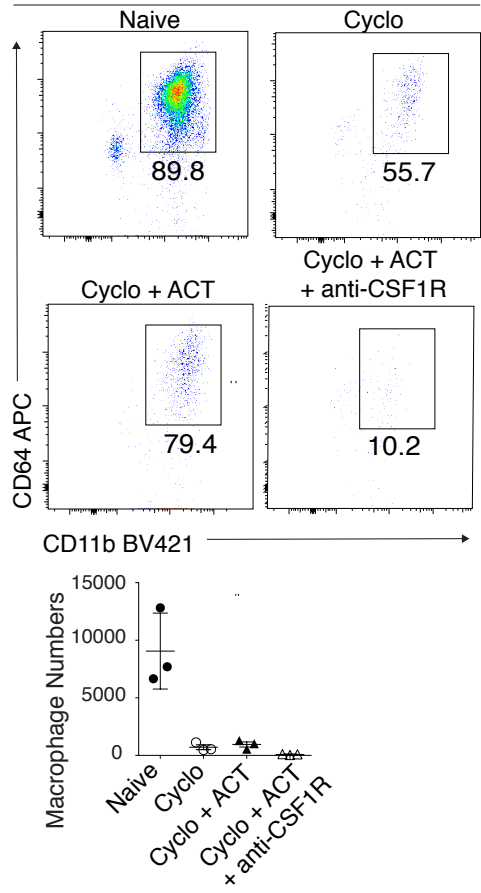

Supplement: NIHMS1524009-supplement-1.pdf [file NIHMS1524009-supplement-1.pdf]
