# Supplementary material
Source: PubMed Central journal article supplement (PMC6525024)

### A No SC Proliferation Following ACT

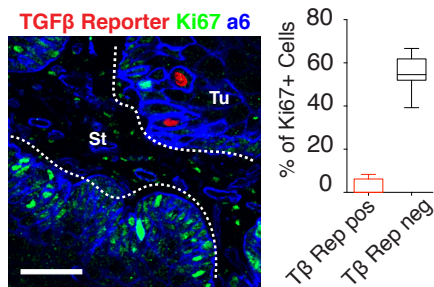

### B No SC Proliferation Following ACT

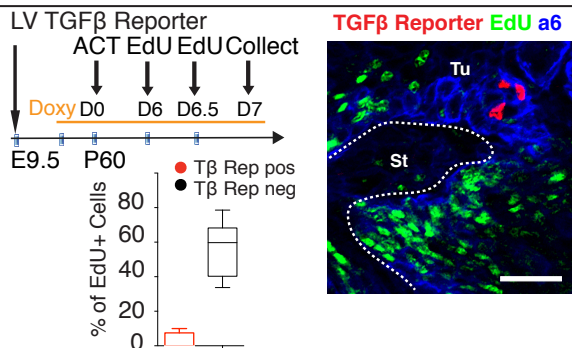

### C Lineage Tracing the TGFβ-Responding tSCs before ACT

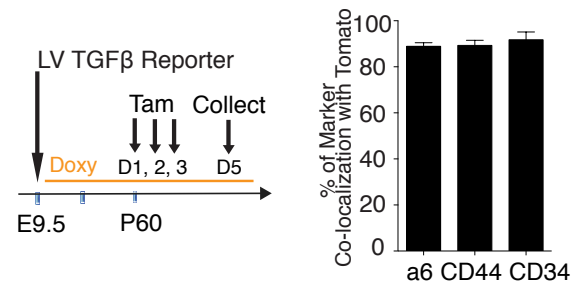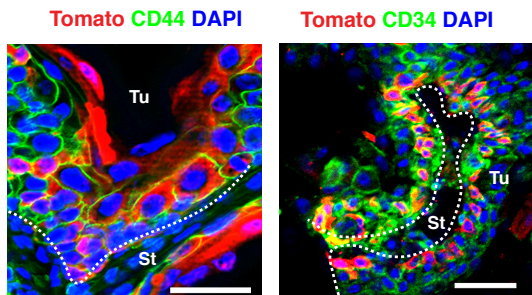

### D Lineage Tracing the TGFβ-Responding tSCs Following ACT

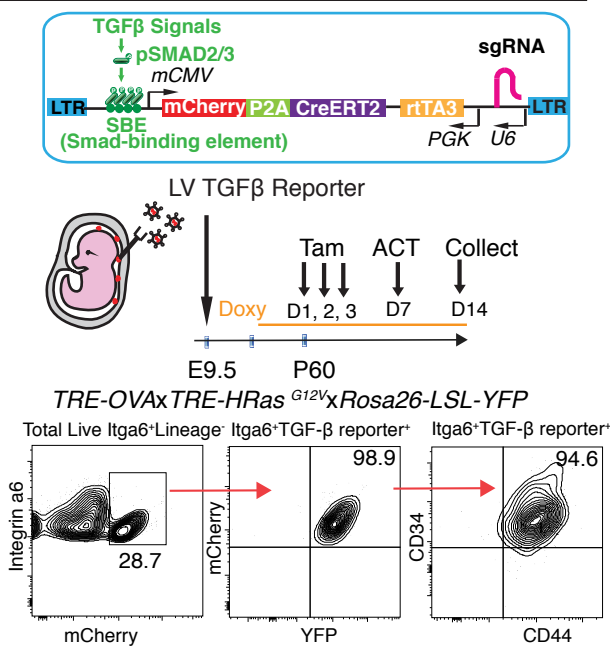

### E MDSCs/TAMs and tSC Survival After ACT

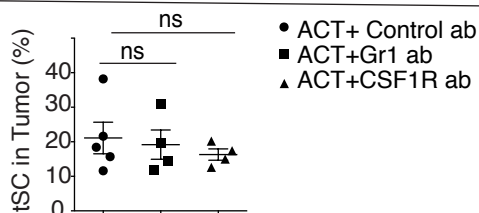

### F Immune Evasion Factors in ACT Survivors

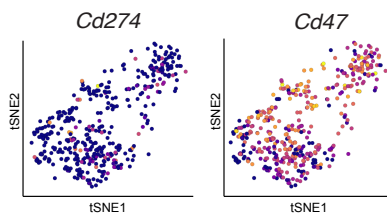

Supplement: NIHMS1524009-supplement-3.pdf [file NIHMS1524009-supplement-3.pdf]
