# Supplementary material
Source: PubMed Central journal article supplement (PMC6525024)

**A** CD80 on Relapsed Tumor After ACT

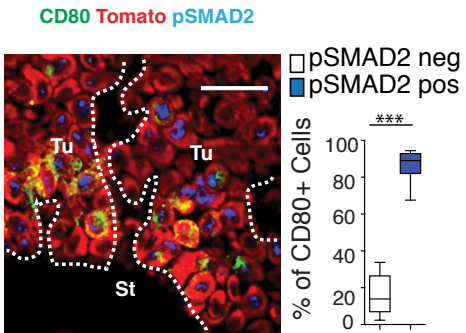

**B** CD80 on tSCCs in DMBA/TPA-Induced Skin SCCs

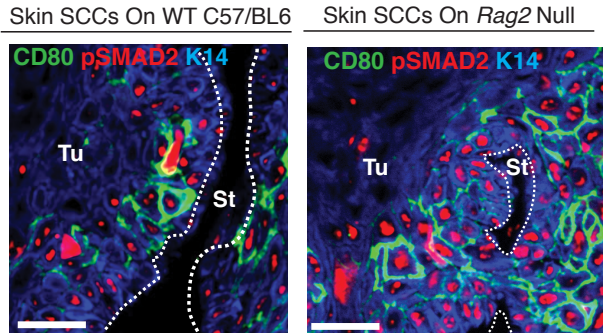

**C** CD80 Expression on Tumor Cells in Human Skin SCCs

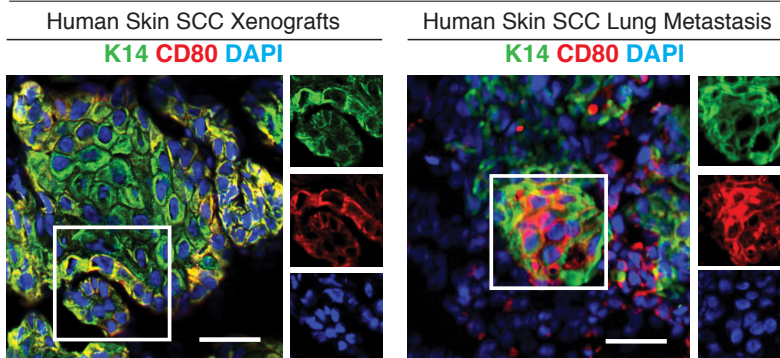

Supplement: NIHMS1524009-supplement-4.pdf [file NIHMS1524009-supplement-4.pdf]
