# Supplementary material
Source: PubMed Central journal article supplement (PMC6525024)

### A CD80 and CTL proliferation

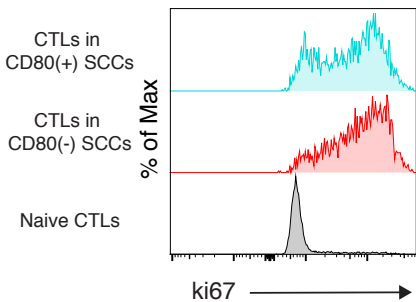

### B Tumor Growth In WT C57/BL6

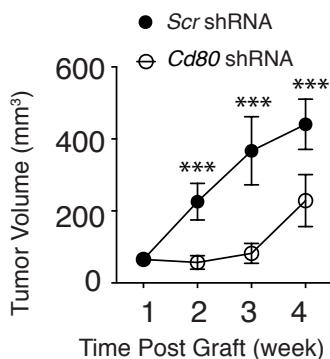

### C Tumor Growth In Rag2-Null Mice

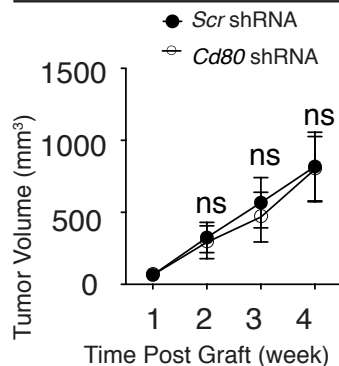

### D Tumor Growth in Cytotoxic T Cells-Depleted Mice

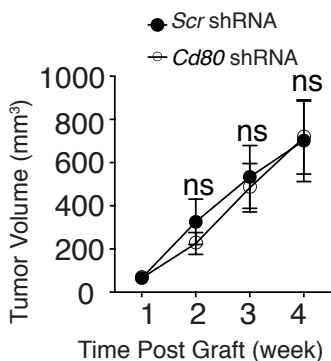

### E Cytotoxic T Cells Infiltration into SCC Tumors

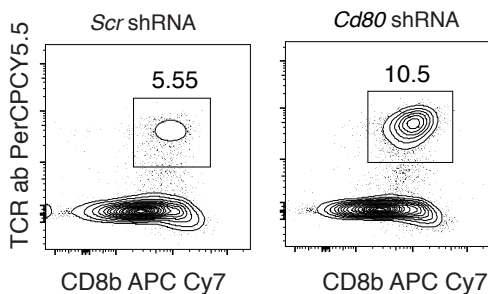

Supplement: NIHMS1524009-supplement-5.pdf [file NIHMS1524009-supplement-5.pdf]
