# Supplementary material
Source: PubMed Central journal article supplement (PMC6525024)

**A** Experimental Scheme for SCC/T Cell Co-culture to Dissect the Involvement of CTLA4, CD28 or PDL1

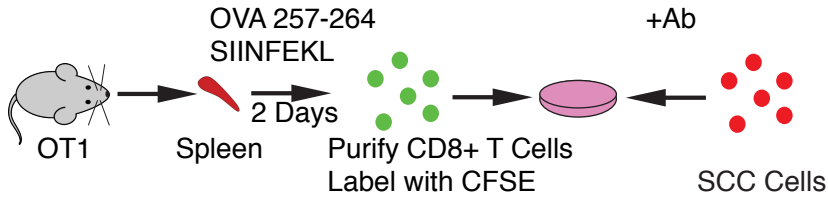

Relative Contribution of CTLA4, CD28 or PDL1 to Tumor CD80-Mediated T Cell Suppression

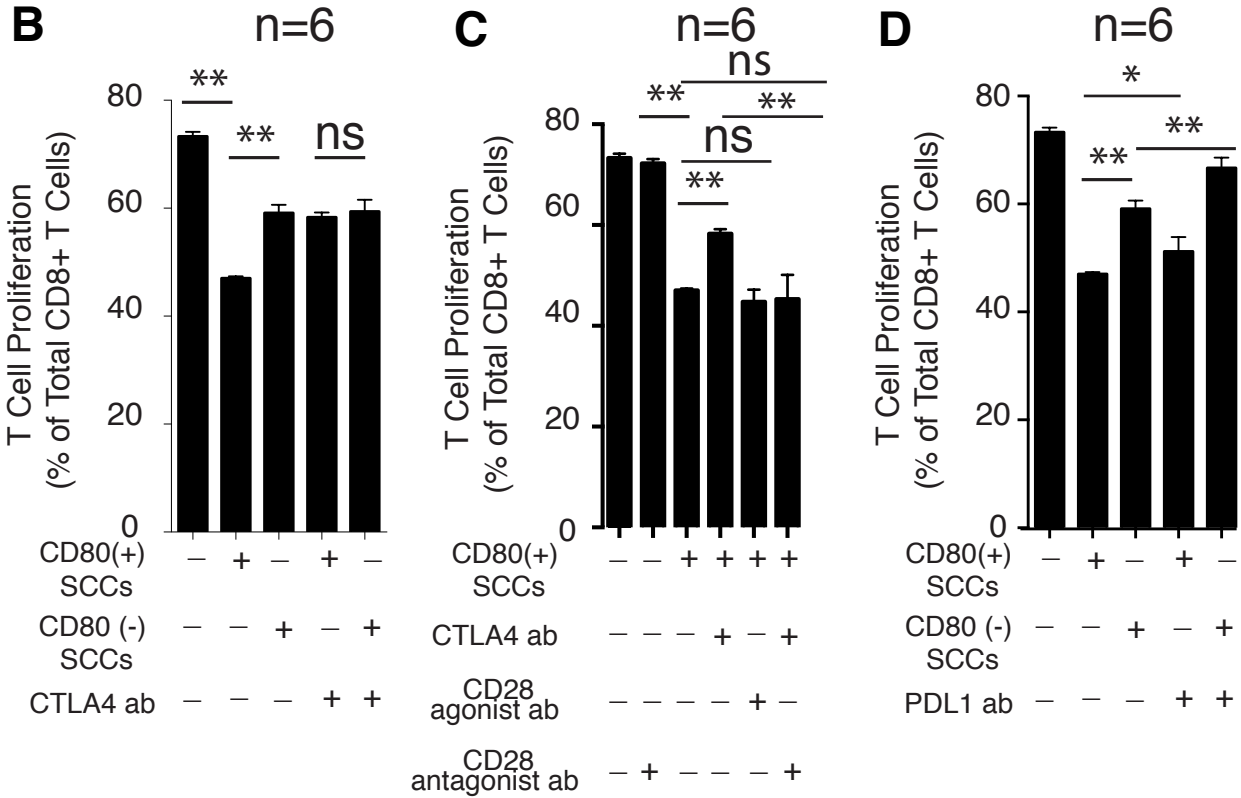

Supplement: NIHMS1524009-supplement-6.pdf [file NIHMS1524009-supplement-6.pdf]
