# Supplementary material
Source: PubMed Central journal article supplement (PMC6525024)

**A**

## Effects of CD80 / CTLA4 on Tumor Growth

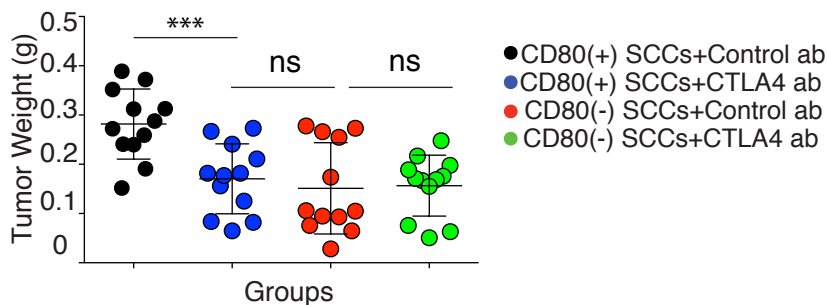**B**

## Experimental Scheme for OT1 T cell specific CTLA4 silencing

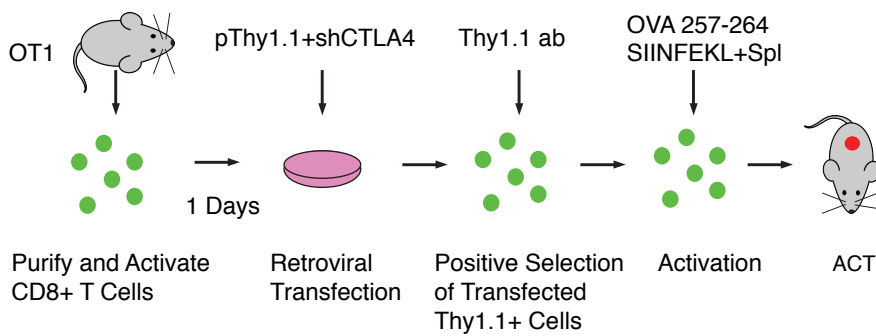**D**

## CTLA4 and tSC Survival After ACT

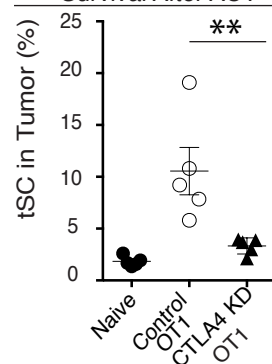**C**

## OT1 T Cell Activity and Exhaustion After ACT

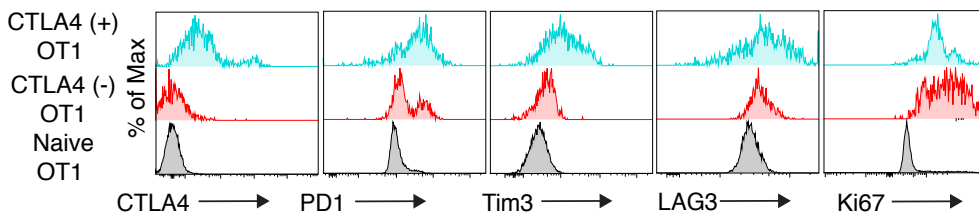**E**  $a6^+$ TGF- $\beta$  reporter $^+$ 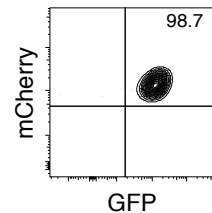**F**

## CD80 scKO Tumor Growth After OT1 Depletion

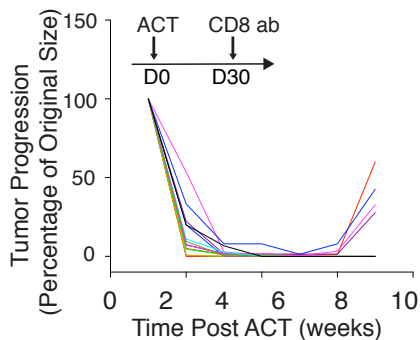**G**

## tSC CD80 and Tumor Growth After ACT

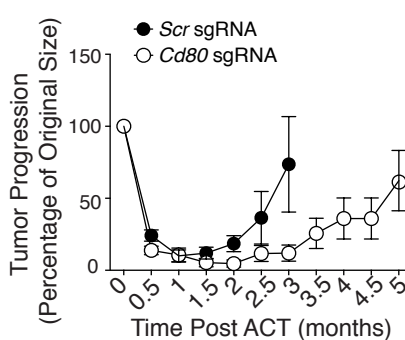**H**CD80 TGF $\beta$ Reporter  $a6$ 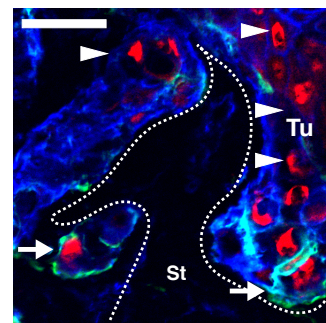

Supplement: NIHMS1524009-supplement-7.pdf [file NIHMS1524009-supplement-7.pdf]
